# Supplementary material for: Construction of antithrombotic and antimicrobial ultra-thin structures on a polyethylene terephthalate implant via the surface grafting of heparin brushes
Source: Royal Society of Chemistry journal article supplement (doi:10.1039/d4bm00778f), 2024-01-01
Supplement: d4bm00778f1.pdf [file d4bm00778f1.pdf]

Construction of antithrombotic and anti-microbial ultra-thin structures on polyethylene terephthalate implant via the surface grafting of heparin brushes

Haobo Zhang<sup>#a</sup>, Dingxuan Wang<sup>#a</sup>, Lilong Wei<sup>b</sup>, Weihan Wang<sup>a</sup>, Zhaorong Ren<sup>a</sup>, Sayyed Asim Ali Shah<sup>c</sup>, Junying Zhang<sup>a</sup>, Jue Cheng<sup>\*a</sup> and Feng Gao<sup>\*a</sup>

<sup>a</sup> School of Material Science and Engineering, Beijing University of Chemistry Technology, North Third Ring Road 15, Chaoyang District, Beijing, China, 100029. Tel: +86 64425439; [gaofeng@mail.buct.edu.cn](mailto:gaofeng@mail.buct.edu.cn)

<sup>b</sup> China-Japan Friendship Hospital, Yinghuayuan north street 2, Chaoyang District, Beijing, China, 100029. [weililong8008@163.com](mailto:weililong8008@163.com)

<sup>c</sup> Department of Chemistry, The University of Lahore, Pakistan. [syedasim814@yahoo.com](mailto:syedasim814@yahoo.com)

\* Correspondence: Gao Feng, Email: [gaofeng@mail.buct.edu.cn](mailto:gaofeng@mail.buct.edu.cn), Tel: +86 64425439

Cheng Jue, Email. [chengjue@mail.buct.edu.cn](mailto:chengjue@mail.buct.edu.cn)

# These authors contributed equally to this work.

## Supporting Information

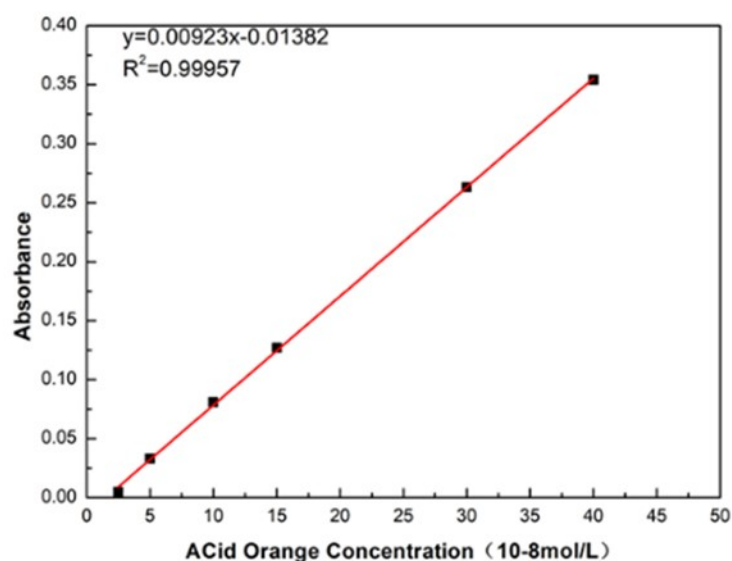

**Figure S1.** concentration-absorbance standard curve of Acid Orange II solution

The UV extinction coefficient ( $\epsilon$ ) was calculated according to Lambert-Beer's law:

$$A = \epsilon cl$$

A: the UV absorbance at 485 nm;

c: concentration;

l: light path.

The light path in the UV-vis examination was 1 cm, and the  $\epsilon$  was calculated according to the linear fitting between the concentration and the UV absorbance at 485 nm (Figure S3).

$$\varepsilon = 9.23 \times 10^5 \text{ cm/mol}$$

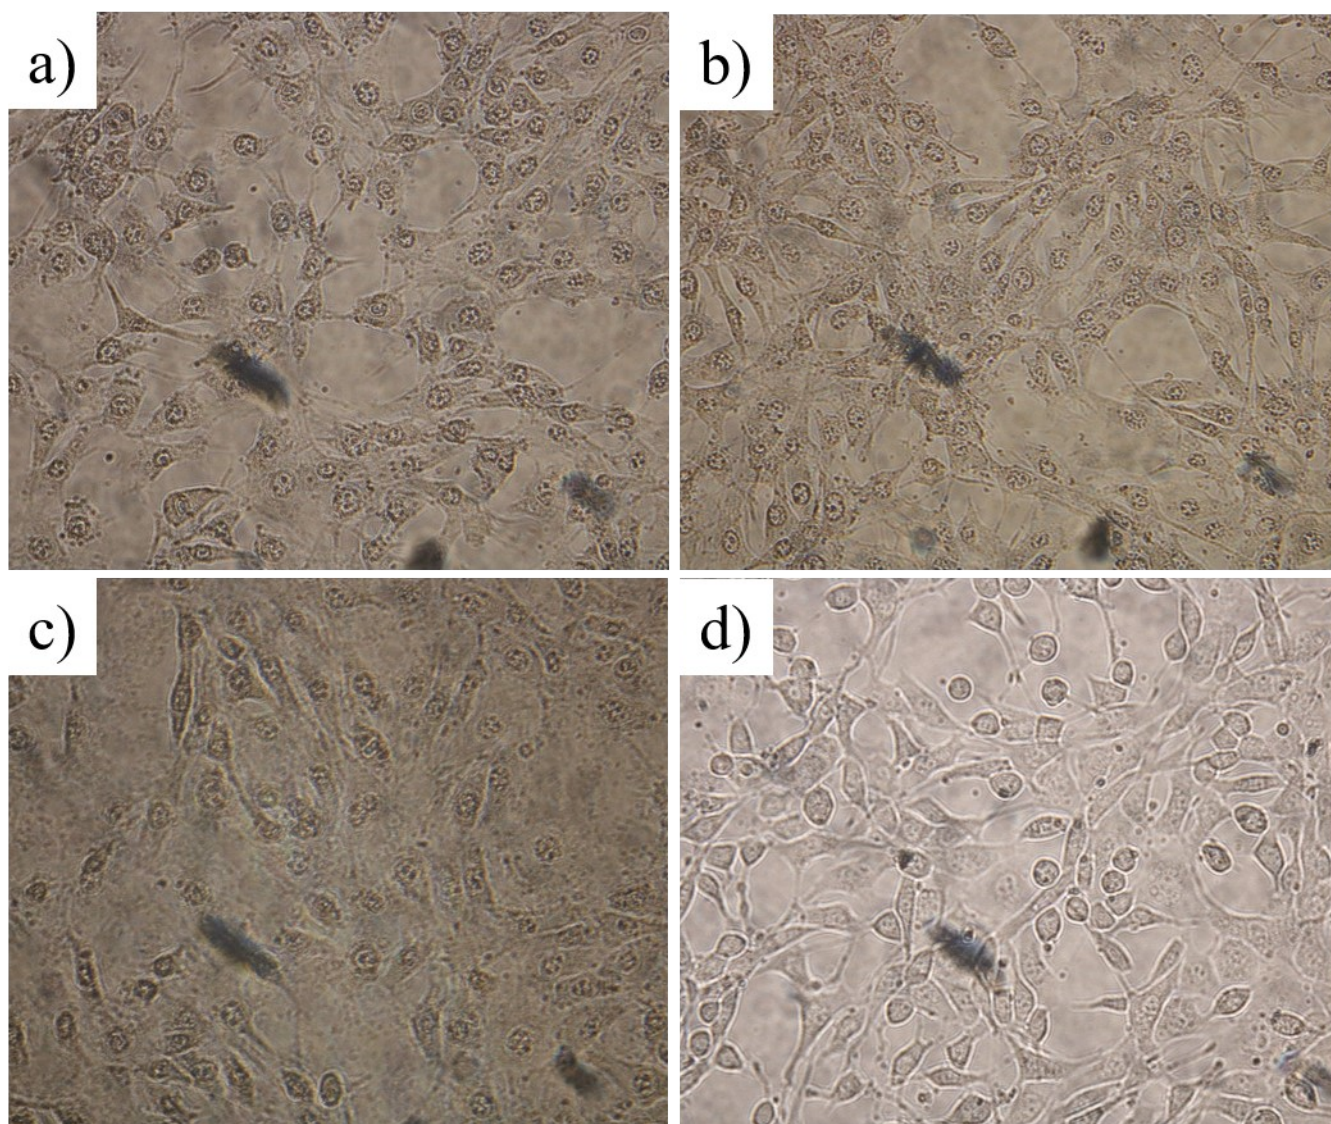

**Figure S2.** Digital photographs of the L929 fibroblasts cells cultured with sample membranes after 24 hours, a) PET; b) Hep1-g-PET; c) Hep2-g-PET; d) Hep3-g-PET.

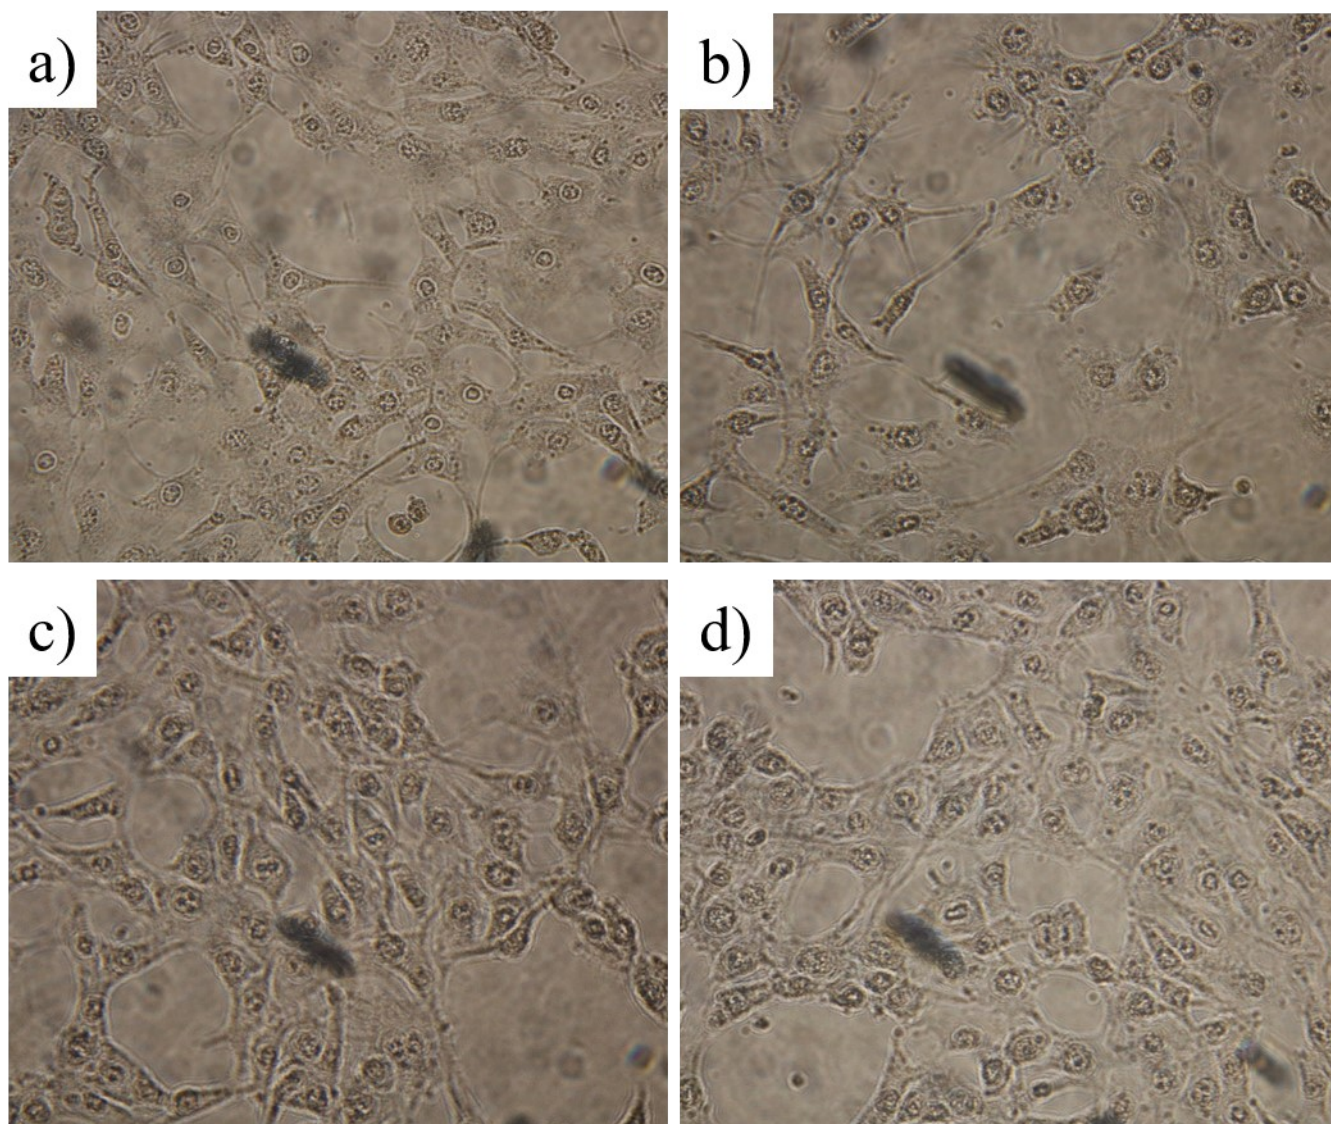

**Figure S3.** Digital photographs of the L929 fibroblasts cells cultured with sample membranes after 48 hours, a) PET; b) Hep1-g-PET; c) Hep2-g-PET; d) Hep3-g-PET.

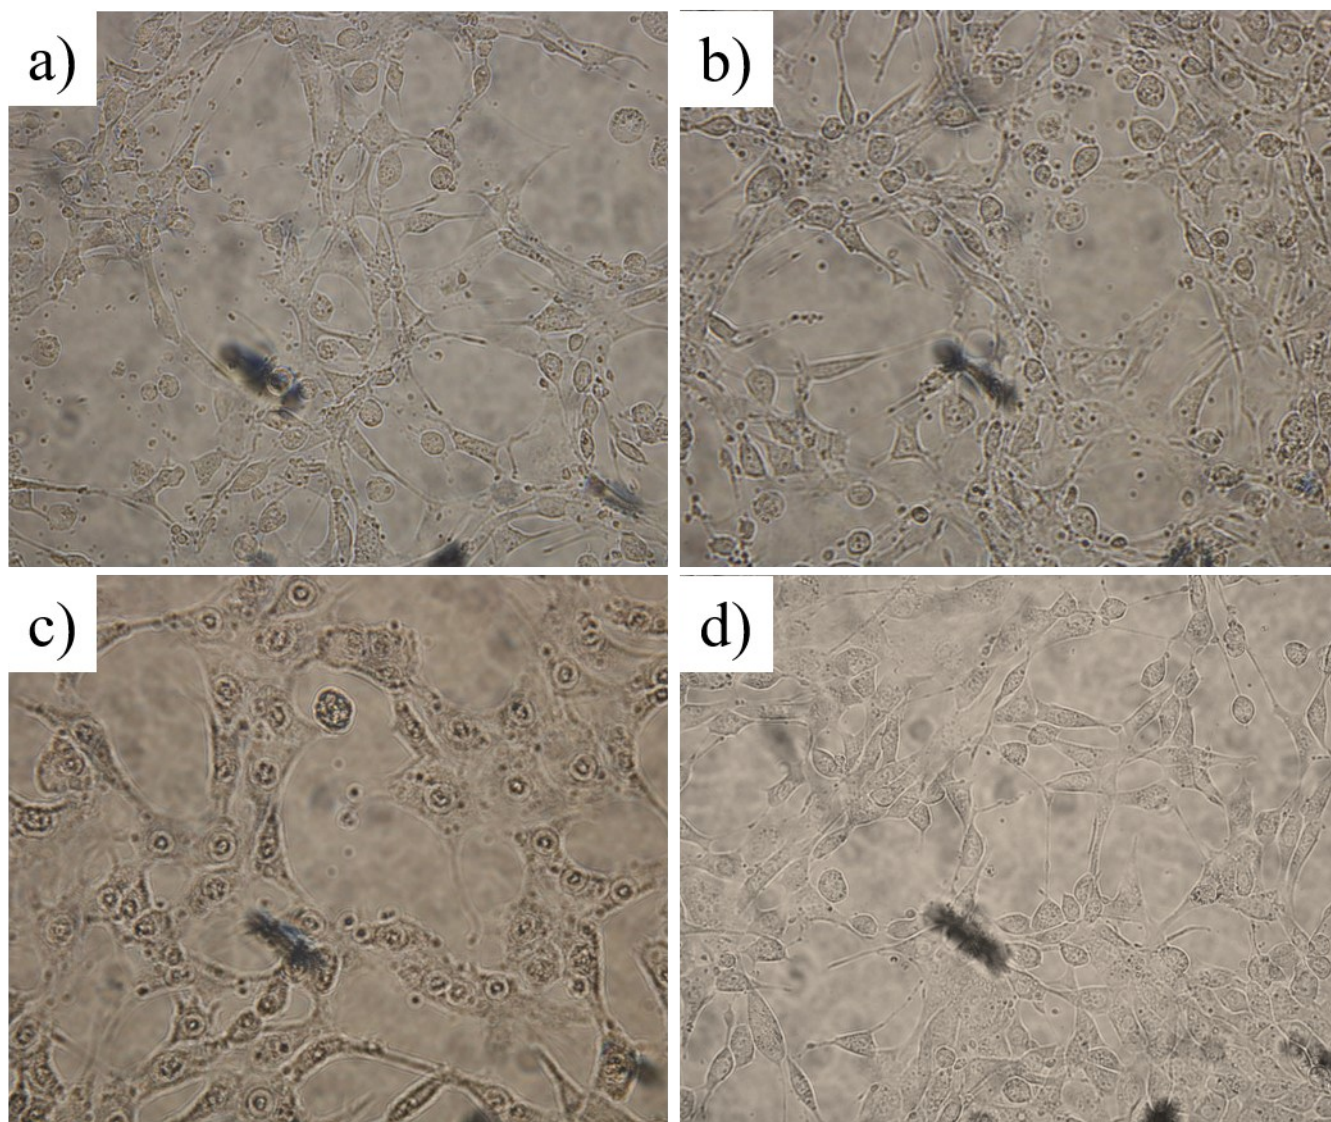

**Figure S4.** Digital photographs of the L929 fibroblasts cells cultured with sample membranes after 72 hours, a) PET; b) Hep1-g-PET; c) Hep2-g-PET; d) Hep3-g-PET.

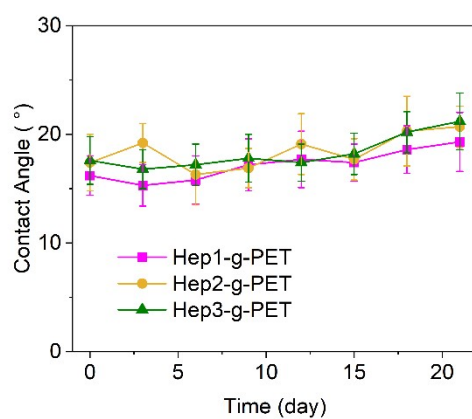

**Figure S5.** The change of contact angles for the modified membranes immersed in PBS.

The membrane before and after the surface modification were cut into round disks with 8 mm diameter. All the disks were placed in 12 wells plate with 1 mL PBS and stored under room temperature. The PBS buffer was replaced every 7 days. The soaked disks were taken out, cleaned by DI water and dried every 3 days. The DI water contact angles of the dried disks were examined and recorded.

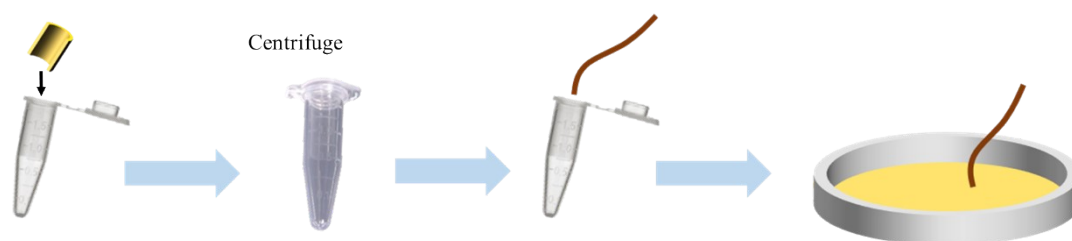

**Figure S6.** The schematically demonstration of the bactericidal efficiency experiment.

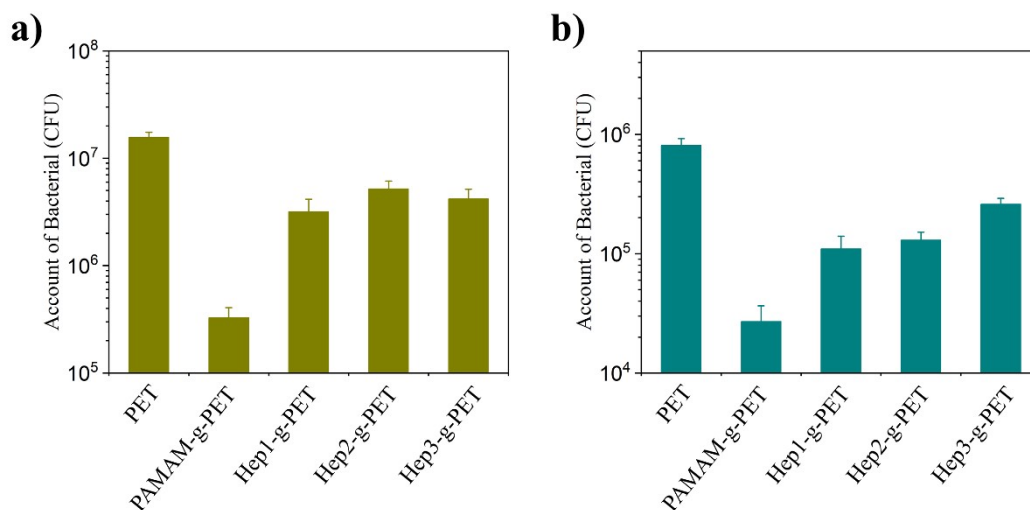

**Figure S7.** The bacterial account on PET cultured with bacterial before and after the surface modification.

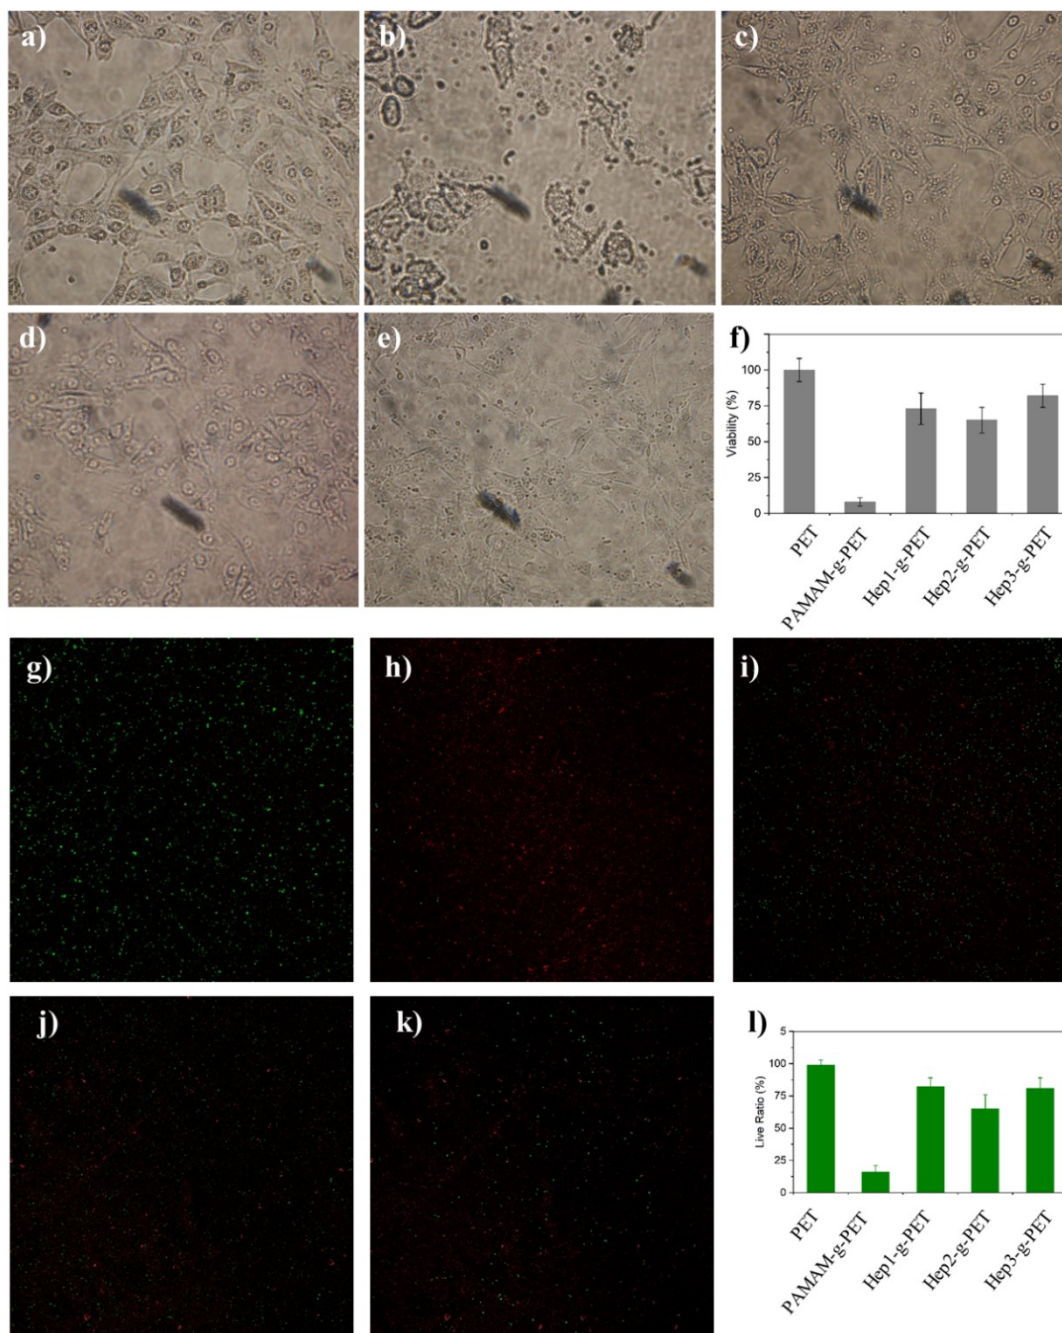

**Figure S8.** The cell cytotoxicity evaluation of functionalized membrane, a-e) photographs of 3T3 fibroblasts cells cultured directly on the surface of PET, PAMAM-g-PET, Hep1-g-PET, Hep2-g-PET and Hep3-g-PET, respectively; f) cell viability evaluated by CCK8 assay; g-k) live/death staining of 3T3 fibroblasts cells cultured directly on the surface of PET, PAMAM-g-PET, Hep1-g-PET, Hep2-g-PET and Hep3-g-PET, respectively; l) cell survive ratio of liv/death evaluation.
